# Supplementary material for: Identification of Nonfunctional Alternatively Spliced Isoforms of STING in Human Acute Myeloid Leukemia
Source: PubMed Central journal article supplement (PMC10962316; doi:10.1158/2767-9764.crc-24-0095), 2024-03-25
Supplement: crc-24-0095-s01.pdf [file crc-24-0095-s01.pdf]

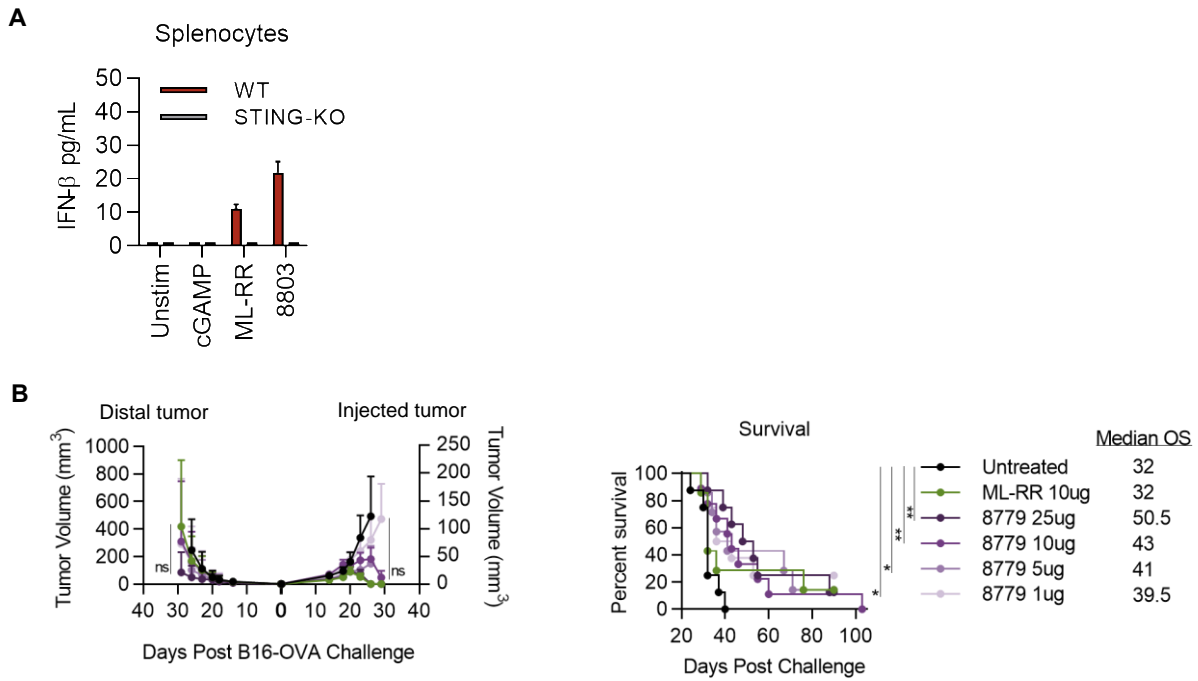

**Supplementary Figure S1:** Modified CDNs 8803 and 8879 activate STING. (A) Splenocytes derived from wild-type or STING-KO mice were treated with cGAMP, ML-RR, and 8803 and supernatants were analyzed for IFN- $\beta$  by ELISA (n = 2). (B) Bilateral B16-OVA tumors treated with ML-RR or titrating doses of 8779 (n = 7-9). Statistical significance in (B) was calculated using unpaired t-test and Log-rank (Mantel-Cox) test. ns = not significant, \* = p<0.05, \*\* = p<0.01, \*\*\* = p<0.001, \*\*\*\* = p<0.0001.
