# Supplementary material for: Identification of Nonfunctional Alternatively Spliced Isoforms of STING in Human Acute Myeloid Leukemia
Source: PubMed Central journal article supplement (PMC10962316; doi:10.1158/2767-9764.crc-24-0095), 2024-03-25
Supplement: crc-24-0095-s02.pdf [file crc-24-0095-s02.pdf]

**A**

|                 | Patient 1 | Patient 2 | Patient 3 | Patient 4 | Patient 5 | Patient 6 | THP-1 | MM411 | MOLM13 | U937 | HL-60 | OCI-AML3 | Kasumi-1 | AML193 |
|-----------------|-----------|-----------|-----------|-----------|-----------|-----------|-------|-------|--------|------|-------|----------|----------|--------|
| Base 12 C->T    |           |           |           |           |           |           |       |       |        |      |       |          |          |        |
| Base 36 T->A    |           | X         |           |           |           | X         |       |       |        |      |       |          |          |        |
| Base 40 A->C    |           | X         |           |           |           |           |       |       |        |      |       |          |          |        |
| Base 41 G->T    |           | X         |           |           |           |           |       |       |        |      |       |          |          |        |
| Base 45 T->A    |           | X         |           |           |           |           |       |       |        |      |       |          |          |        |
| Base 144 C->G   | X         | X         |           |           |           |           | X     | X     | X      | X    | X     | X        | X        | X      |
| Base 300 A->T   |           |           |           |           |           |           |       |       |        |      |       | X        |          |        |
| Base 382 C->T   | X         |           |           |           |           |           |       |       |        |      |       |          |          |        |
| Base 603 C->T   | X         |           |           |           |           | X         |       |       |        |      |       |          |          | X      |
| Base 899 C->T   | X         |           |           |           |           |           |       |       |        |      |       |          |          |        |
| Base 761 C->T   | X         |           |           |           |           |           |       |       |        |      |       |          |          |        |
| Base 899 C->T   |           |           |           |           |           |           |       |       |        |      |       |          |          | X      |
| Base 977 C->A   |           |           |           |           |           |           |       |       |        |      |       |          |          | X      |
| G230A           |           | X         |           |           |           |           | X     |       | X      | X    | X     | X        |          |        |
| R71H            | X         |           |           |           |           |           | X     |       | X      | X    | X     | X        |          |        |
| R232H           | X         |           |           |           |           |           |       | X     |        |      |       |          | X        | X      |
| R293Q           |           |           |           |           |           |           | X     |       |        |      | X     | X        |          |        |
| Intron 3 retain |           |           |           |           | X         | X         |       |       | X      | X    | X     |          |          |        |
| Exon 2 deletion | X         |           |           |           |           |           |       |       |        |      |       |          |          |        |
| Exon 4 deletion | X         |           |           |           |           | X         |       |       |        |      |       |          |          |        |
| Exon 7 deletion |           | X         | X         |           | X         | X         | X     |       | X      | X    | X     | X        |          |        |
| Wildtype        |           |           | X         | X         | X         |           |       | X     |        |      |       | X        |          | X      |

**B**

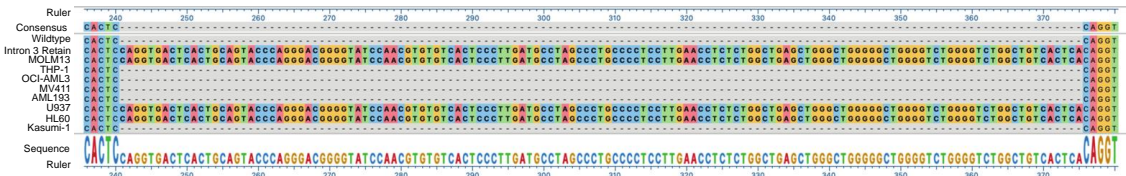

**C**

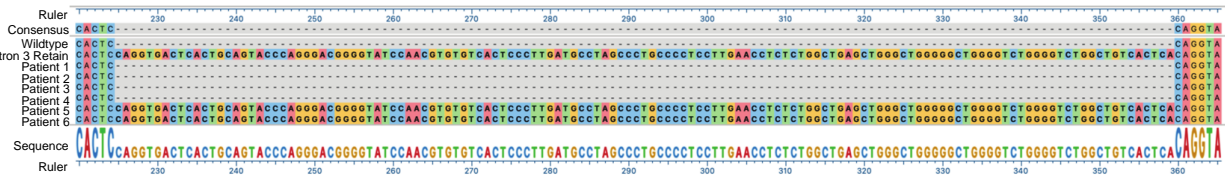

**D**

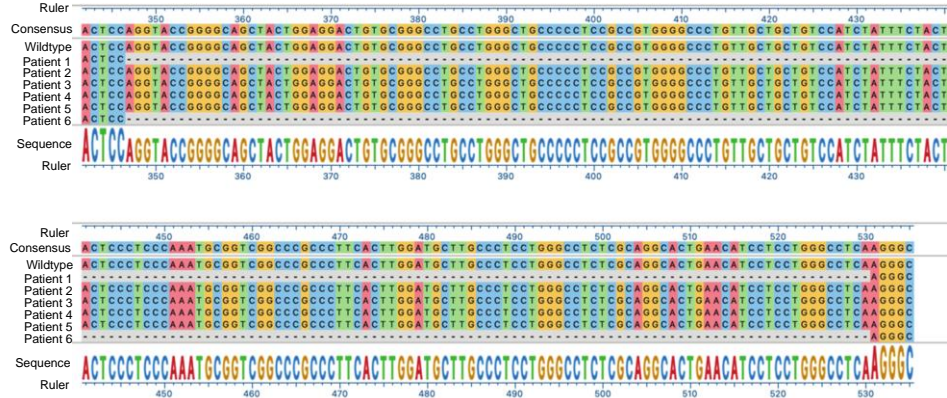

**Supplementary Figure S2: Analysis of STING isoforms amplified from patient bone marrow samples. (A) Detected nucleotide mutations and STING variants in patient bone marrow samples. (B) Alignment of nucleotide sequences from human wild-type STING, intron 3 retained STING, and AML cell line derived sequences spanning intron 3. (C) Alignment of nucleotide sequences derived from patient samples spanning intron 3 and (D) exon 4.**
