# Supplementary material for: Identification of Nonfunctional Alternatively Spliced Isoforms of STING in Human Acute Myeloid Leukemia
Source: PubMed Central journal article supplement (PMC10962316; doi:10.1158/2767-9764.crc-24-0095), 2024-03-25
Supplement: crc-24-0095-s03.pdf [file crc-24-0095-s03.pdf]

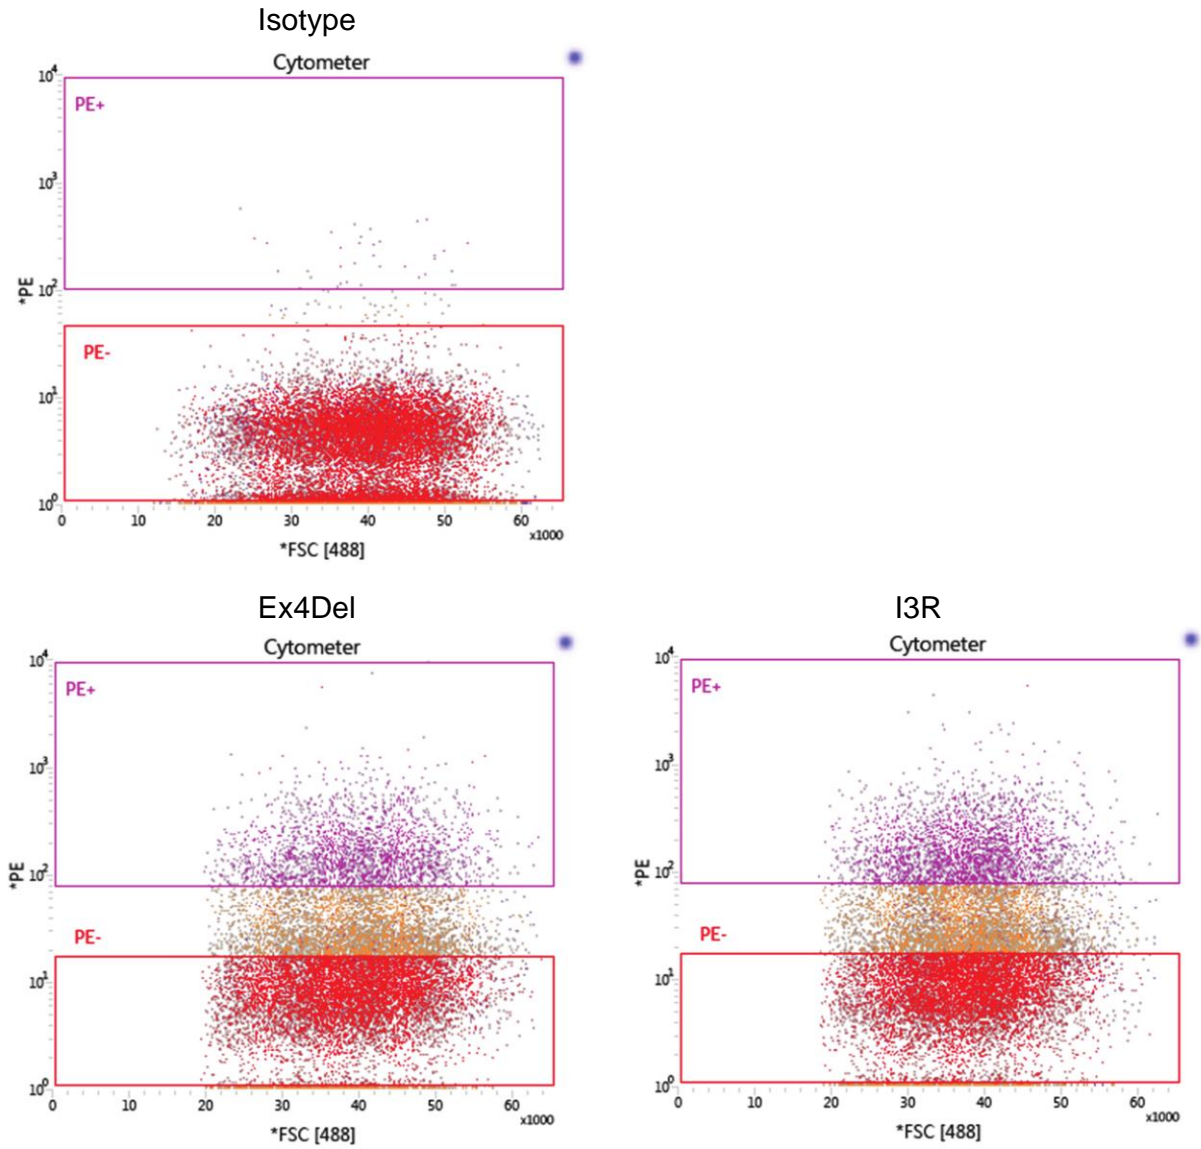

**Supplementary Figure S3:** Representative gating scheme for sorting HEK cells transduced with STING variants
